# Supplementary material
Source: PubMed Central journal article supplement (PMC11181009)

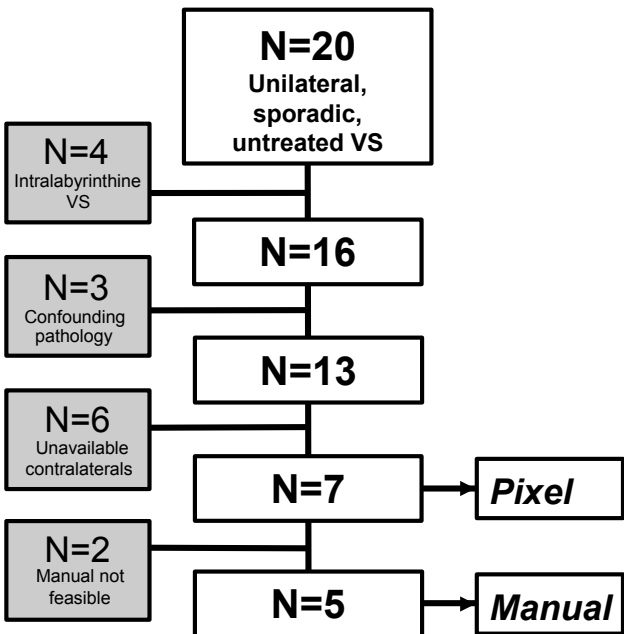

Supplement: NIHMS1960376-supplement-1.pdf [file NIHMS1960376-supplement-1.pdf]

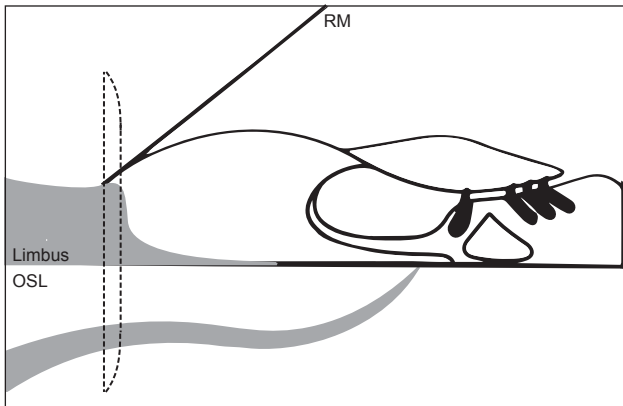

Supplement: NIHMS1960376-supplement-2.pdf [file NIHMS1960376-supplement-2.pdf]

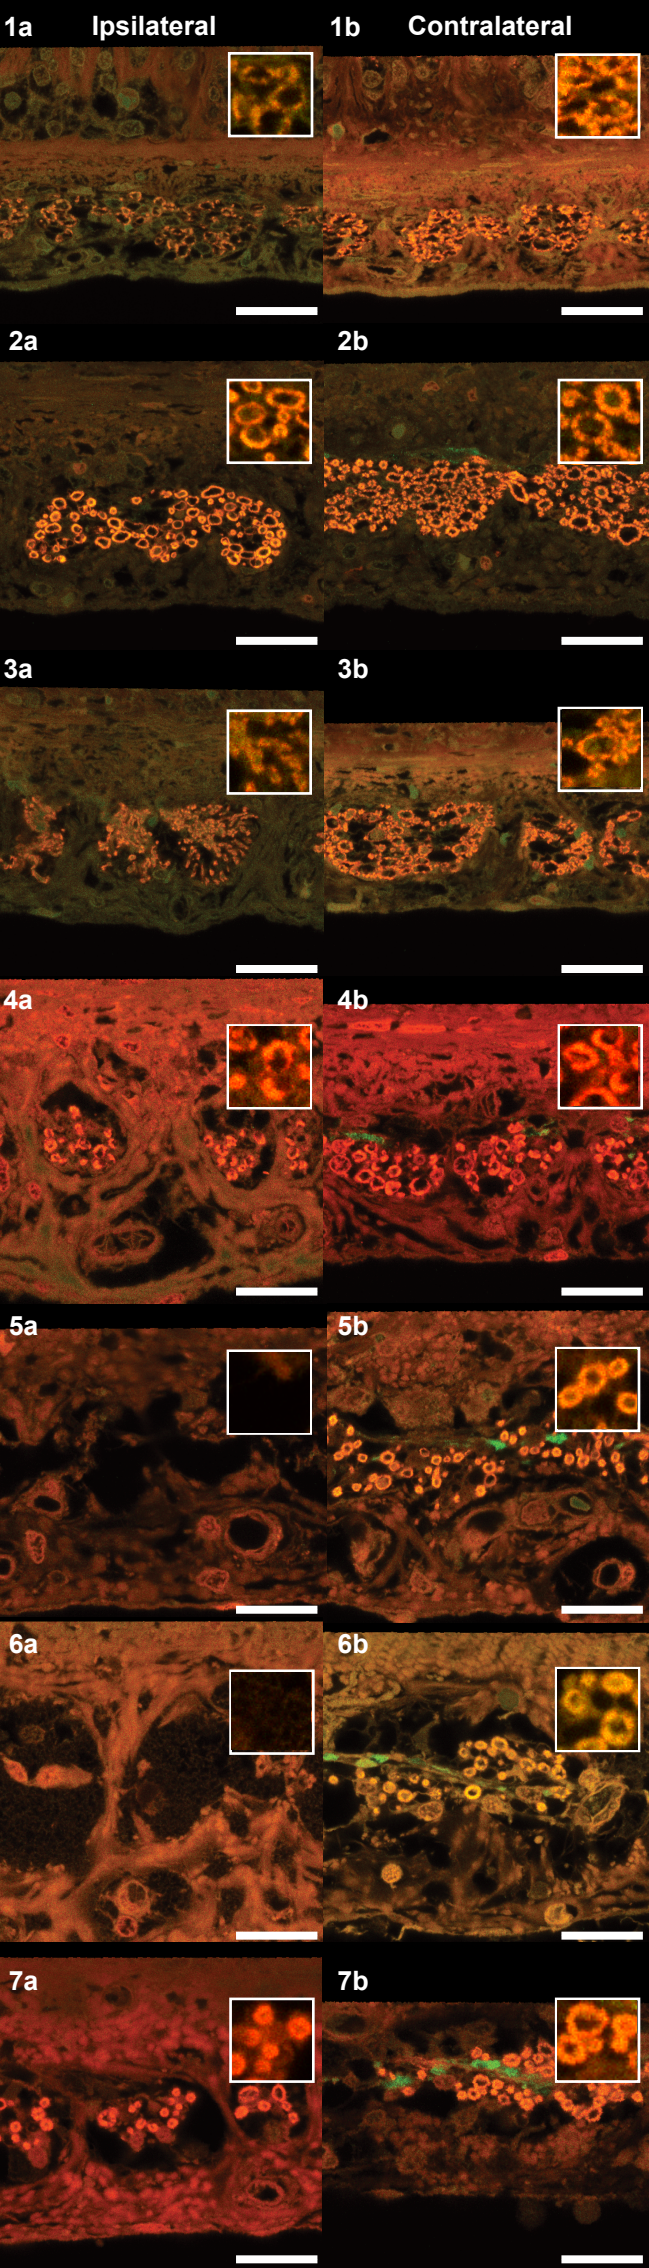

Supplement: NIHMS1960376-supplement-3.pdf [file NIHMS1960376-supplement-3.pdf]
